# Supplementary material for: Ovotransferrin Fibril—Gum Arabic Complexes as Stabilizers for Oleogel-in-Water Pickering Emulsions: Formation Mechanism, Physicochemical Properties, and Curcumin Delivery
Source: MDPI journal article supplement (doi:10.3390/foods13091323), 2024-04-26
Supplement: s1 [file s1]

Supplementary Information

# Ovotransferrin Fibril—Gum Arabic Complexes as Stabilizers for Oleogel-in-Water Pickering Emulsions: Formation Mechanism, Physicochemical Properties, and Curcumin Delivery

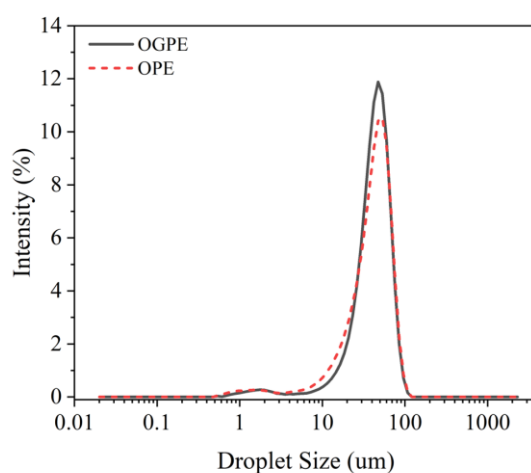

**Figure S1.** Average droplet sizes of OPE and OGPE.
